# Supplementary material for: Intermolecular interactions underlie protein/peptide phase separation irrespective of sequence and structure at crowded milieu
Source: PubMed Central journal article supplement (PMC10550955; doi:10.1038/s41467-023-41864-9), 2023-10-04
Supplement: 41467_2023_41864_MOESM2_ESM.pdf [file 41467_2023_41864_MOESM2_ESM.pdf]

## Description of Additional Supplementary files

**Supplementary movie 1:** Liquid-liquid phase separation and fusion of Albumin (Alb) Time-lapse movie showing the condensate formation of Alb. The movie shows an increase in condensate size over time due to fusion. The experiment is performed two times with similar observations.

**Supplementary movie 2:** Liquid-liquid phase separation and fusion of Ubiquitin (Ub) Time-lapse movie showing condensate formation of Ub. The movie shows an increase in condensate size over time due to fusion. The experiment is performed two times with similar observations.
